# Supplementary material
Source: publisher figshare collection journal article supplement (https://acs.figshare.com/ndownloader/files/12794420)
Supplement: Supplementary file 1 [file 12794420]

Archive with 3 entries (3 files):
- PAM2_IR.pdf
- SI_JPCC.pdf
- SI_JPCC.tex
