# Supplementary material
Source: publisher figshare collection journal article supplement (https://acs.figshare.com/ndownloader/files/12794420)

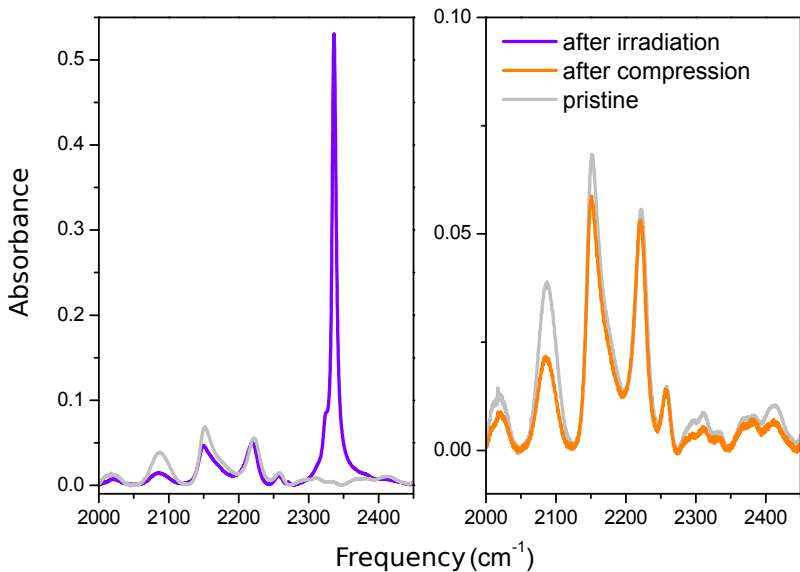

Supplement: Supplementary file 1 [file 12794420 › PAM2_IR.pdf]
